# Supplementary material for: Environmental monitoring using next generation sequencing: rapid identification of macroinvertebrate bioindicator species
Source: Springer Nature journal article supplement (doi:10.1186/1742-9994-10-45), 2013-01-01

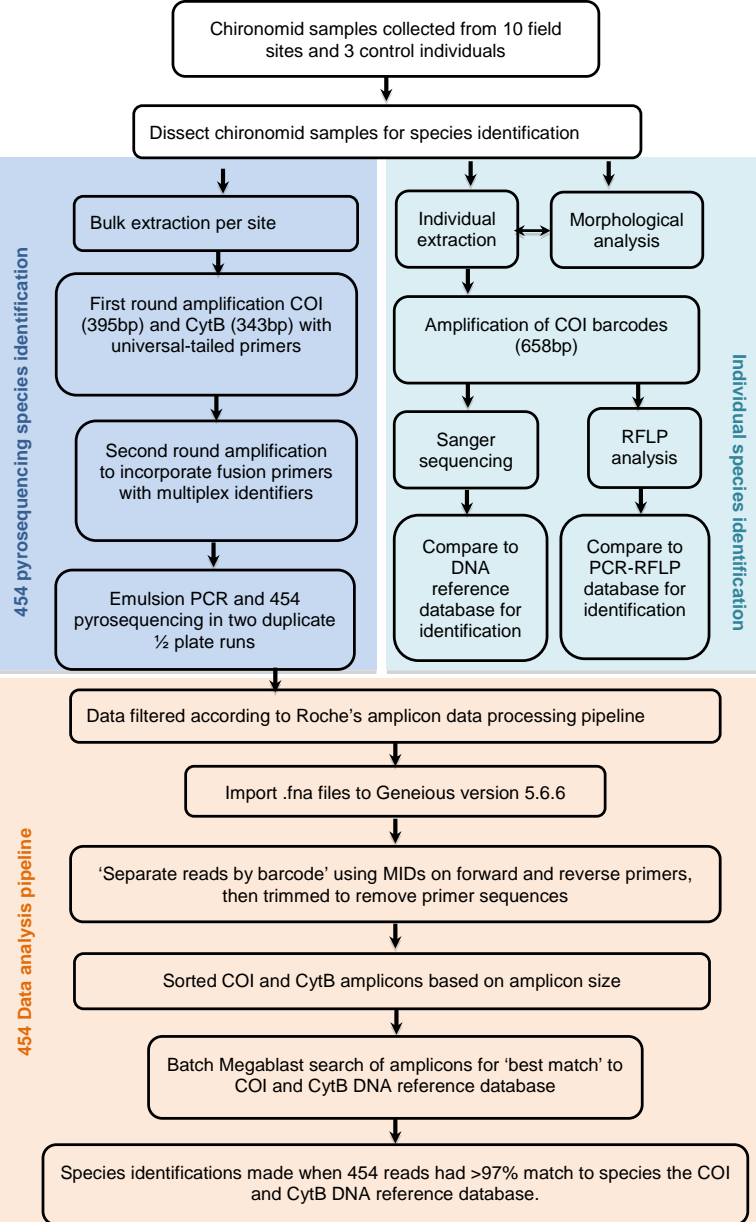

Supplement: 12983_2013_259_MOESM9_ESM.pdf [file 12983_2013_259_MOESM9_ESM.pdf]
